# Supplementary material
Source: ML conference proceedings conference paper supplement (https://proceedings.mlr.press/v97/nalisnick19b.html)
Supplement: Supplementary file [file nalisnick19b-supp.pdf]

---

# Supplementary Materials: Hybrid Models with Deep and Invertible Features

---

Eric Nalisnick<sup>\*1</sup> Akihiro Matsukawa<sup>\*1</sup> Yee Whye Teh<sup>1</sup> Dilan Gorur<sup>1</sup> Balaji Lakshminarayanan<sup>1</sup>

## A. Background on Affine Coupling Layers

One ACL performs the following operations (Dinh et al., 2017):

1. *Splitting*:  $\mathbf{x}$  split it at dimension  $d$  into two separate vectors  $\mathbf{x}_{:d}$  and  $\mathbf{x}_d$ . (using Python list syntax).
2. *Identity and Affine Transformations*: Given the split  $\{\mathbf{x}_{:d}, \mathbf{x}_d\}$ , each undergoes a separate operation:

$$\text{identity} : \mathbf{h}_{:d} = \mathbf{x}_{:d} \quad (1)$$

$$\text{affine} : \mathbf{h}_d = t(\mathbf{x}_{:d}; \phi_t) + \mathbf{x}_d \odot \exp\{s(\mathbf{x}_{:d}; \phi_s)\}$$

where  $t(\cdot)$  and  $s(\cdot)$  are translation and scaling operations with no restrictions on their functional form. We can compute them with neural networks that take as input  $\mathbf{x}_{:d}$ , the other half of the original vector, and since  $\mathbf{x}_{:d}$  has been copied forward by the first operation, no information is lost that would jeopardize invertibility.

3. *Permutation*: Lastly, the new representation  $\mathbf{h} = \{\mathbf{h}_{:d}, \mathbf{h}_d\}$  is ready to be either treated as output or fed into another ACL. If the latter, then the elements should be modified so that  $\mathbf{h}_{:d}$  is not again copied but rather subject to the affine transformation. Dinh et al. (2017) simply exchange the components (i.e.  $\{\mathbf{h}_{:d}, \mathbf{h}_d\}$ ) whereas Kingma & Dhariwal (2018) apply a  $1 \times 1$  convolution, which can be thought of as a continuous generalization of a permutation.

Several ACLs are composed to create the final form of  $f(\mathbf{x}; \phi)$ , which is called a *normalizing flow* (Rezende & Mohamed, 2015). Crucially, the Jacobian of these operations is efficient to compute, simplifying to the sum of all the scale transformations:

$$\begin{aligned} \log \left| \frac{\partial \mathbf{f}_\phi}{\partial \mathbf{x}} \right| &= \log \exp \left\{ \sum_{l=1}^L s_l(\mathbf{x}_{:d}; \phi_{s,l}) \right\} \\ &= \sum_{l=1}^L s_l(\mathbf{x}_{:d}; \phi_{s,l}) \end{aligned}$$

where  $l$  is an index over ACLs. The Jacobian of a  $1 \times$

---

<sup>\*</sup>Equal contribution <sup>1</sup>DeepMind. Correspondence to: Balaji Lakshminarayanan <balajiln@google.com>.

1 convolution does not have as simple of an expression, but Kingma & Dhariwal (2018) describe ways to reduce computation.

## B. Additional Semi-Supervised Results

### B.1. Hyperparameters for Semi-supervised learning

The hyperparameters are described in Table S1.

| Hyper-parameter                                              | Grid values  |
|--------------------------------------------------------------|--------------|
| Dropout rate                                                 | 0, 0.2, 0.5  |
| $\epsilon_{\text{VAT}}$ for Virtual Adversarial Training     | 1, 5         |
| $\lambda_{\text{EM}}$ for Entropy Minimization loss          | 0, 0.3, 1, 3 |
| $\lambda_{\text{VAT}}$ for Virtual Adversarial Training loss | 0, 0.3, 1, 3 |

Table S1. Hyperparameters for the semi-supervised learning experiments.

### B.2. Semi-supervised learning on SVHN

The results are shown in Table S2. Similar to the semi-supervised results on MNIST, we observe that our model can effectively leverage unlabeled data.

| Model                   | SVHN-Error ↓ | SVHN-NLL ↓  |
|-------------------------|--------------|-------------|
| 1000 labels only        | 19.26%       | 0.78        |
| 1000 labels + unlabeled | 5.90%        | 0.38        |
| All labeled             | 4.86%        | 0.26        |
| All labeled + unlabeled | <b>2.80%</b> | <b>0.17</b> |

Table S2. Results of hybrid model for semi-supervised learning on SVHN. Arrows indicate which direction is better.

## C. Extensions

### C.1. Mixed Effects Model

To model heteroscedastic noise, we can also add “random effects” to the model at the latent level. The model is then:

$$\begin{aligned} \mathbb{E}[y_n | \mathbf{x}_n] &= g^{-1} \left( \beta^T f(\mathbf{x}_n; \phi) + \mathbf{u}^T \mathbf{a}_n \right), \\ \mathbf{u} &\sim p(\mathbf{u}), \quad \mathbf{a}_n \sim p(\mathbf{a}) \end{aligned}$$

where  $\mathbf{a}_n$  is a vector of random effects associated with the fixed effects  $\mathbf{x}_n$ , and  $\mathbf{u}$  are the corresponding parameters in the GLM. Note that Depeweg et al. (2018) also use random effects model to handle heteroscedastic noise, but add them at the input level.

## References

- Depeweg, S., Hernández-Lobato, J. M., Doshi-Velez, F., and Udluft, S. Decomposition of Uncertainty in Bayesian Deep Learning for Efficient and Risk-sensitive Learning. In *ICML*, 2018.
- Dinh, L., Sohl-Dickstein, J., and Bengio, S. Density Estimation Using Real NVP. In *International Conference on Learning Representations (ICLR)*, 2017.
- Kingma, D. P. and Dhariwal, P. Glow: Generative Flow with Invertible 1x1 Convolutions. In *Advances in Neural Information Processing Systems (NeurIPS)*, 2018.
- Rezende, D. and Mohamed, S. Variational Inference with Normalizing Flows. In *International Conference on Machine Learning (ICML)*, 2015.
